# Supplementary material for: Psychological factors and premenstrual syndrome: A Spanish case-control study
Source: PLoS One. 2019 Mar 6;14(3):e0212557. doi: 10.1371/journal.pone.0212557 (PMC6402625; doi:10.1371/journal.pone.0212557)
Supplement: S1 File — (PDF) [file pone.0212557.s001.pdf]

# ESTUDIO DE LOS FACTORES DE RIESGO DE LA DISMENORREA Y DEL SÍNDROME PREMENSTRUAL

## INSTRUCCIONES

- En las preguntas abiertas ponga un dígito en cada casilla.
- En las preguntas multiopción llene el círculo sin salirse de él.

Correcto: ● ⊗

Incorrecto: ✗ ✖

### PACIENTE

|                      |                      |                      |                      |
|----------------------|----------------------|----------------------|----------------------|
| fecha nacimiento     | edad menarquia       | peso (Kg)            | talla (cm)           |
| <input type="text"/> | <input type="text"/> | <input type="text"/> | <input type="text"/> |
| <input type="text"/> | <input type="text"/> | <input type="text"/> | <input type="text"/> |
| <input type="text"/> | <input type="text"/> | <input type="text"/> | <input type="text"/> |

no tiene primarios medios superiores

estudios ☐ ☐ ☐ ☐ profesión

embarazos ☐ ☐ ☐ ☐ abortos ☐ ☐ ☐ ☐

(para las no embarazadas) ahora antes nunca

toma anovulatorios ☐ ☐ ☐ ... desde ☐ ☐ ☐ ☐

¿es portadora de DIU? ☐ ☐ ☐ ... desde ☐ ☐ ☐ ☐

### SÍNTOMAS

¿qué regularidad tienen sus menstruaciones? ☐ ☐ ☐ ☐

¿el dolor de sus menstruaciones varió después de tomar anovulatorios? ☐ ☐ ☐ ☐

¿durante los días previos y durante la regla tiene estos síntomas?

| los 5 días antes de la regla...            | en la última regla    |                       |                       |                       | habitualmente         |                       |                       |                       |
|--------------------------------------------|-----------------------|-----------------------|-----------------------|-----------------------|-----------------------|-----------------------|-----------------------|-----------------------|
|                                            | 1                     | 2                     | 3                     | 4                     | 1                     | 2                     | 3                     | 4                     |
| ...se siente irritable, enfadada           | <input type="radio"/> |
| ...tensa, con ansiedad                     | <input type="radio"/> |
| ...llorosa, emotiva                        | <input type="radio"/> |
| ...deprimida, hundida                      | <input type="radio"/> |
| ...menos interés en actividades domésticas | <input type="radio"/> |
| ...Ídem en actividades laborales           | <input type="radio"/> |
| ...Ídem en actividades sociales            | <input type="radio"/> |
| ...dificultad para concentrarse            | <input type="radio"/> |
| ...se siente cansada o apática             | <input type="radio"/> |
| ...come más, tiene antojos                 | <input type="radio"/> |
| ...duerme menos de lo normal               | <input type="radio"/> |
| ...suele dormir más de lo normal           | <input type="radio"/> |
| ...se siente abrumada, sin control         | <input type="radio"/> |

¿tuvo 1 ó más de los siguientes síntomas: pechos sensibles, dolor de cabeza o muscular, vientre hinchado o sintió como si ganara peso? ☐ ☐ ☐ ☐

¿algún problema anterior interfirió en su rendimiento laboral? ☐ ☐ ☐ ☐

...en su relación con sus compañeros? ☐ ☐ ☐ ☐

...en su relación con sus familiares? ☐ ☐ ☐ ☐

...en su vida social? ☐ ☐ ☐ ☐

...en las tareas de su hogar? ☐ ☐ ☐ ☐

| desde el 1º día de la regla...                         | en la última regla    |                       |                       |                       |                       | habitualmente         |                       |                       |                       |                       |
|--------------------------------------------------------|-----------------------|-----------------------|-----------------------|-----------------------|-----------------------|-----------------------|-----------------------|-----------------------|-----------------------|-----------------------|
|                                                        | 1                     | 2                     | 3                     | 4                     | 5                     | 1                     | 2                     | 3                     | 4                     | 5                     |
| ...tiene retortijones abdominales                      | <input type="radio"/> |
| ...tiene dolor intermitente                            | <input type="radio"/> |
| ...se acurruca en cama con algo caliente en el vientre | <input type="radio"/> |
| ...tiene más doloridas las zonas lumbar y abdominal    | <input type="radio"/> |
| ...tiene dolor de espalda                              | <input type="radio"/> |
| ...tiene náuseas                                       | <input type="radio"/> |

| durante la regla...              | en la última regla    |                       |                       |                       |                       | habitualmente         |                       |                       |                       |                       |
|----------------------------------|-----------------------|-----------------------|-----------------------|-----------------------|-----------------------|-----------------------|-----------------------|-----------------------|-----------------------|-----------------------|
|                                  | 1                     | 2                     | 3                     | 4                     | 5                     | 1                     | 2                     | 3                     | 4                     | 5                     |
| ...tiene dolor sordo, no intenso | <input type="radio"/> |
| ...toma aspirina para el dolor   | <input type="radio"/> |
| ...toma otro medicamento         | <input type="radio"/> |
| ...se siente débil o mareada     | <input type="radio"/> |
| ...tiene diarrea                 | <input type="radio"/> |
| ...tiene estreñimiento           | <input type="radio"/> |

...el dolor dura (días)...

...el dolor le incapacita en su actividad diaria (días)

¿el dolor interfirió en su rendimiento laboral?

...en su vida social?

...en las tareas del hogar?

...la hemorragia es...

### COMORBILIDADES

¿ha sido diagnosticada de alguna de las siguientes enfermedades? Si fue así ¿a qué edad comenzó? (puede cubrir más de una opción)

|                     | diagnóstico médica sin HC | diagnóstico médica en HC |
|---------------------|---------------------------|--------------------------|
| ovario poliquístico | <input type="radio"/>     | <input type="radio"/>    |
| endometriosis       | <input type="radio"/>     | <input type="radio"/>    |

### MEDICAMENTOS

¿durante los últimos 3 meses ha tomado al menos 3 veces por semana algún medicamento? (incluidos complejos vitamínicos)

|                      |                       |                       |                       |                       |
|----------------------|-----------------------|-----------------------|-----------------------|-----------------------|
| <input type="text"/> | <input type="radio"/> | <input type="radio"/> | <input type="radio"/> | <input type="radio"/> |
| <input type="text"/> | <input type="radio"/> | <input type="radio"/> | <input type="radio"/> | <input type="radio"/> |
| <input type="text"/> | <input type="radio"/> | <input type="radio"/> | <input type="radio"/> | <input type="radio"/> |
| <input type="text"/> | <input type="radio"/> | <input type="radio"/> | <input type="radio"/> | <input type="radio"/> |

### CONSUMO DE TABACO

¿ha fumado de manera regular (al menos 1 cigarrillo, puro o pipa al día) durante más de 6 meses? no si

|             | con filtro            | sin filtro            | edad la 1ª vez       | edad última vez      | nº                   | al día                | a la semana           |
|-------------|-----------------------|-----------------------|----------------------|----------------------|----------------------|-----------------------|-----------------------|
| rubio       | <input type="radio"/> | <input type="radio"/> | <input type="text"/> | <input type="text"/> | <input type="text"/> | <input type="radio"/> | <input type="radio"/> |
| negro       | <input type="radio"/> | <input type="radio"/> | <input type="text"/> | <input type="text"/> | <input type="text"/> | <input type="radio"/> | <input type="radio"/> |
| puros/pipas | <input type="radio"/> | <input type="radio"/> | <input type="text"/> | <input type="text"/> | <input type="text"/> | <input type="radio"/> | <input type="radio"/> |

|                                                                      |                       |                       |                       |                       |                       |                       |
|----------------------------------------------------------------------|-----------------------|-----------------------|-----------------------|-----------------------|-----------------------|-----------------------|
| nº personas que fuman en casa                                        | <input type="radio"/> |
| ¿cuántas horas pasa a la semana en lugares en los que la gente fuma? | <input type="radio"/> |

### EJERCICIO FÍSICO

su actividad física comparando con otras personas de su misma edad es...

¿cuántos minutos dedica al día a caminar o ir en bicicleta al trabajo o de compras?

en su tiempo libre...

|                                        | mucho menor           | menor                 | igual                 | mayor                 | mucho mayor           |
|----------------------------------------|-----------------------|-----------------------|-----------------------|-----------------------|-----------------------|
| ... pasea en bicicleta                 | <input type="radio"/> |
| ... practica un deporte                | <input type="radio"/> |
| ... ve la televisión                   | <input type="radio"/> |
| ... pasea caminando                    | <input type="radio"/> |
| ... suele hacer algo que le haga sudar | <input type="radio"/> |

si suele practicar algunos deportes o ir al gimnasio, indique la intensidad que requieren y el tiempo que les dedica:

|                                                                     | pequeña               | media                 | grande                |
|---------------------------------------------------------------------|-----------------------|-----------------------|-----------------------|
| intensidad (1º deporte)                                             | <input type="radio"/> | <input type="radio"/> | <input type="radio"/> |
| intensidad (2º deporte)                                             | <input type="radio"/> | <input type="radio"/> | <input type="radio"/> |
| pequeña: andar; media: ciclismo, gimnasia, natación; grande: fútbol |                       |                       |                       |
| nº horas semanales que dedica a 1º deporte                          | <input type="text"/>  | ...a 2º deporte       | <input type="text"/>  |
| nº meses al año que dedica a 1º deporte                             | <input type="text"/>  | ...a 2º deporte       | <input type="text"/>  |

SUEÑO

¿cuántas horas acostumbra a dormir por la noche?

<= 6789> 9

¿en qué grado está satisfecho con la calidad de su sueño?

nadapocoregularbastantemucho

¿cuántos minutos suele dormir de siesta?

01-1516-3031-45>46

CARÁCTER

Grado de acuerdo:

A: en desacuerdo total

B: bastante en desacuerdo

C: neutral

D: bastante de acuerdo

E: totalmente de acuerdo

¿En qué medida está de acuerdo con las siguientes frases?

A

B

C

D

E

ESTRÉS PERCIBIDO

durante los últimos 3 meses globalmente Vd. diría que se ha sentido identificado con las frases siguientes:

nadaalgotregularbastantemucho

incapaz de controlar cosas importantes en su vida

sin confianza para manejar sus problemas personales

que las cosas no le van bien

con tantos problemas que se sintió sobrepasado

OBSERVACIONES

AFRONTAMIENTO

Indique qué hace y qué siente ante ellos

nunca

a veces

a menudo

muy a menudo

me oriento hacia el trabajo o a otras actividades para distraer mi mente

concentro mis esfuerzos en hacer algo sobre la situación en la que estoy

me digo a mí mismo/a que "esto no es real"

utilizo el alcohol u otras drogas para sentirme mejor

intento obtener el apoyo emocional de los demás

me doy por vencido a la hora de lidiar con ello

tomo medidas para hacer que la situación sea mejor

me niego a creer lo que ha sucedido

me digo a mí mismo/a cosas para dejar que los sentimientos desagradables se escapen

busco ayuda y consejo de los demás

consumo alcohol u otras drogas para que me ayuden a ir tirando

intento verlo desde otro ángulo para hacer que las cosas parezcan más positivas

me critico a mí mismo/a

intento elaborar una estrategia sobre qué hacer

Intento conseguir el apoyo y la comprensión de alguien

renuncio a hacerle frente a la situación

busco algo bueno en lo que ha sucedido

hago bromas sobre ello

hago algo para pensar menos en eso, como ir al cine, ver la TV, leer, dormir ...

acepto la realidad de que eso haya sucedido

expreso mis sentimientos negativos

intento buscar apoyo en la religión o en mis creencias espirituales

intento que otras personas me ayuden o me aconsejen sobre qué hacer

aprendo a vivir con ello

pienso mucho en cuáles son los pasos a seguir

me culpo a mí mismo/a por las cosas que suceden

rezo o medito

bromeo sobre la situación
